# Supplementary material for: Antibacterial Activities and Underlying Mechanisms of the Compound SYAUP-491 against Xanthomonas oryzae pv. oryzae
Source: MDPI journal article supplement (doi:10.3390/molecules29061413), 2024-03-21
Supplement: s1 [file s1]

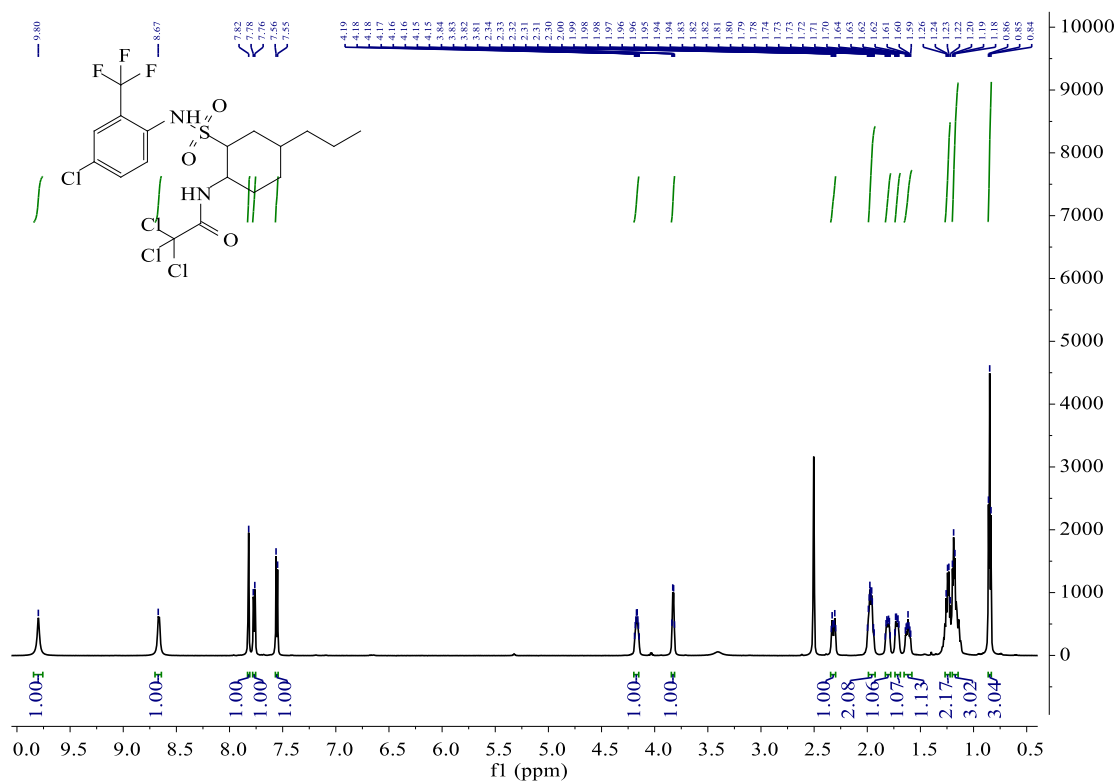

Figure S1.  $^1\text{H}$  NMR spectrum of compound SYAUP-491

$^1\text{H}$  NMR (600 MHz,  $\text{DMSO}-d_6$ )  $\delta$  0.85 (t,  $J$  = 7.1 Hz, 3H,  $\text{CH}_3$ ), 2.34–1.18 (m, 11H,  $\text{C}_6\text{H}_{12}$ ), 3.83 (t,  $J$  = 10.3 Hz, 1H, CH-N), 4.17 (td,  $J$  = 7.1, 3.7 Hz, 1H, CH- $\text{SO}_2$ ), 7.55–7.82 (m, 3H, Ph-H), 8.67 (d,  $J$  = 8.4 Hz, 1H, CO-NH), 9.80 (s, 1H,  $\text{SO}_2$ -NH)
