# Supplementary material for: Antibacterial Activities and Underlying Mechanisms of the Compound SYAUP-491 against Xanthomonas oryzae pv. oryzae
Source: MDPI journal article supplement (doi:10.3390/molecules29061413), 2024-03-21
Supplement: s1 [file s1]

| Product   | Molecular weight | Molecular Formula                                                                              | Precise molecular weight | M+H      | Measurement value | Deviation ppm |
|-----------|------------------|------------------------------------------------------------------------------------------------|--------------------------|----------|-------------------|---------------|
| SYAUP-491 | 544.23           | C <sub>18</sub> H <sub>21</sub> Cl <sub>4</sub> F <sub>3</sub> N <sub>2</sub> O <sub>3</sub> S | 541.9979                 | 543.0052 | 543.0047          | -0.9          |

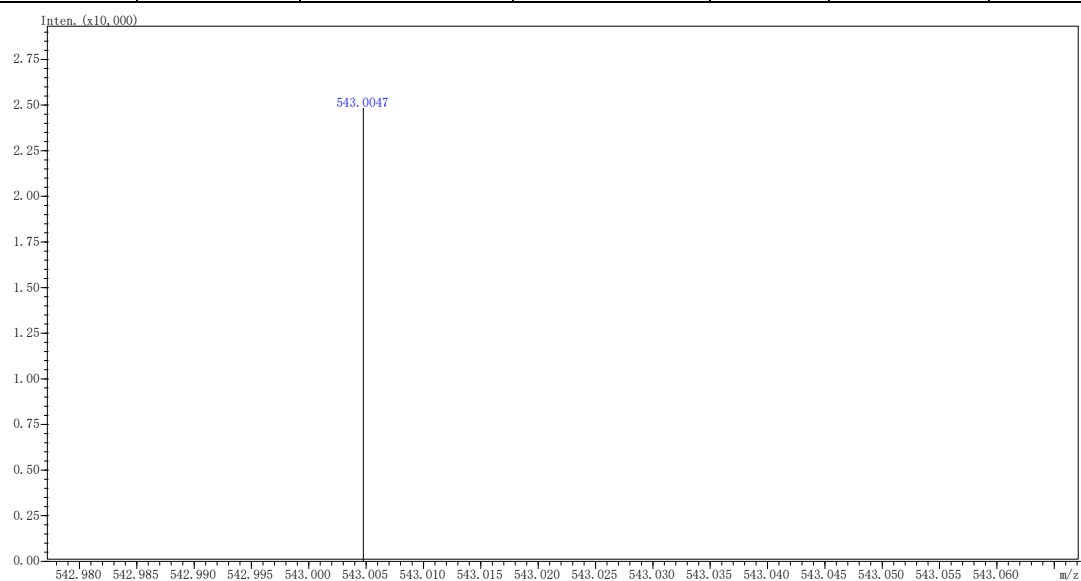

Figure S2. HRMS spectrum of compound SYAUP-491
